# Supplementary material for: Significant Growth by Rickettsia Species within Human Macrophage-Like Cells Is a Phenotype Correlated with the Ability to Cause Disease in Mammals
Source: Pathogens. 2021 Feb 19;10(2):228. doi: 10.3390/pathogens10020228 (PMC7934685; doi:10.3390/pathogens10020228)
Supplement: Supplementary file 1 [file pathogens-10-00228-s001.pdf]

**Supplementary Table 1. Primers and probes used for quantitative PCR (qPCR).**

| <i>Rickettsia</i> spp. | Primer/Probe             | Sequence (5' → 3')                                              |
|------------------------|--------------------------|-----------------------------------------------------------------|
| <i>R. africae</i>      | Sca1_africae_fwd         | CGT GGT ATG TAC GGC ACT AAT AA                                  |
|                        | Sca1_africae_rev         | TTT CAG CAT CGA ACC CGA TAG                                     |
|                        | Sca1_africae             | /56-FAM/ACC GGT CAT/ZEN/ATT CTC AAC GCG TCC/3IABkFQ/            |
| <i>R. rickettsii</i>   | Rr Sca1 F5271            | CAA GCT CGT TAT TAC CCC GAA T                                   |
|                        | Sca1_RR_R5371            | CTA CCG CTC CTT GGA ATG TTA GAC C                               |
|                        | Sca1_RC_RR_Probe         | /56-FAM/TCG GCT TAA/ZEN/GAT ACG GGA AGT/3IABkFQ/                |
| <i>R. parkeri</i>      | Rpp Sca-1 (316 bp) FWD   | TGA TTC GTA ACA GAT TAG ATG C                                   |
|                        | Rpp Sca-1 (316 bp) REV   | CCG TAA ATA GAA ACC ACA TGA C                                   |
|                        | Rpp Sca-1 PRB Set 2      | /56-FAM/ACC GGT CAT/ZEN/ATT CTC AAC GCG TCC/3IABkFQ/            |
| <i>R. akari</i>        | Sca1akari_444_fwd        | ACT AAC AGA GCA AAC GCC TAA                                     |
|                        | Sca1akari_568_rev        | CGG TGA TGC CAG AGA AGT ATT                                     |
|                        | Sca1_akari(494-518)probe | /56-FAM/CGC CTA CTG/ZEN/TTA GCC CAG CTT CAA/3IABkFQ/            |
| <i>R. bellii</i>       | Sca1bellii_13_fwd        | GAC AGG GTA GCT GCA GAT ATA AA                                  |
|                        | Sca1bellii_162_rev       | CCC AAG GAG CTA TGT TCA TTA GT                                  |
|                        | Sca1_bellii(57-83)probe  | /56-FAM/<br>TGC AGC GAA/ZEN/AGG CTT AAA CGA TCA AC<br>/3IABkFQ/ |
| Host Cell Actin        | Primer/Probe             | Sequence (5' → 3')                                              |
| pEC3                   | Actin-F420               | CCT GTA TGC CTC TGG TCG TA                                      |
|                        | Actin-R681               | CCA TCT CCT GCT CGA AGT CT                                      |
|                        | Actin_MS_Probe           | /5MAXN/ ACT GTG CCC/ZEN/ATC TAC GAG/3IABkFQ/                    |

All primers and probes for *Rickettsia* species were designed from the rickettsial antigen, Sca1.

## Supplemental Figure Legends

**Supplemental Figure 1: *R. akari* st. Columbia significantly grows within endothelial cells (EA.hy926) and human derived macrophage cells (THP-1). (A,B)**

EA.hy926 cells and PMA-differentiated THP-1 cells were infected with *R. akari* st. Columbia (MOI=2.5), and genomic DNA was extracted at each time point post-infection. Each time point represents the ratio of *R. akari sca1* to host cell *actin* genes amplified from genomic DNA and determined by quantitative PCR (qPCR). Immunofluorescence microscopy growth analyses in EA.hy926 cells at days 1 and 3 post-infection (**C**) and in PMA-differentiated THP-1 cells at days 1 and 4 post-infection demonstrate significant intracellular proliferation. DAPI (blue) was used to visualize host cell nuclei, anti-*Rickettsia* antibody (RcPFA) followed by Alexa Fluor 488 (green) was utilized to reveal *R. rickettsii* st. Sheila Smith, and Alexa Fluor 546 Phalloidin (red) was used to indicate the host actin cytoskeleton in **C** and **D**. Scale bar= 10  $\mu$ m. A logistic regression test was used to measure significance ( $p<0.05$ ) in growth over time in both mammalian cell lines in **A** and **B**.

**Supplemental Figure 2: *R. africae* proliferates within endothelial cells (EA.hy926) and human derived macrophage cells (THP-1). (A,B)**

EA.hy926 cells and PMA-differentiated THP-1 cells were infected with *R. africae* (MOI=2.5), and genomic DNA was extracted at each time point post-infection. Each time point represents the ratio of *R. africae sca1* to host cell *actin* genes amplified from genomic DNA and determined by quantitative PCR (qPCR). A logistic regression test was used to measure significance ( $p<0.05$ ) in growth over time in both mammalian cell lines in **A** and **B**.

Immunofluorescence microscopy growth analyses in EA.hy926 cells at days 1 and 5 post-infection (**C**) and in PMA-differentiated THP-1 cells at days 4 and 6 post-infection

demonstrate significant intracellular proliferation. DAPI (blue) was used to visualize host cell nuclei, anti-*Rickettsia* antibody (RcPFA) followed by Alexa Fluor 488 (green) was utilized to reveal *R. africae*, and Alexa Fluor 546 Phalloidin (red) was used to indicate the host actin cytoskeleton in **C** and **D**. Scale bar= 10  $\mu$ m.

**Supplemental Figure 3: *R. rickettsii* strain Iowa exhibits significant intracellular replication within endothelial cells (EA.hy926) but not in human derived macrophage cells (THP-1).**

**(A,B)** EA.hy926 cells and PMA-differentiated THP-1 cells were infected with *R. rickettsii* st. Iowa (MOI=2.5), genomic DNA was extracted at each indicated time point post-infection and then growth was determined by qPCR. A logistic regression test was used to measure significance ( $p < 0.05$ ) in growth over time and indicated growth in EA.hy926 cells (A), but not in THP-1 cells (B). Immunofluorescence microscopy growth analyses in EA.hy926 cells at days 1 and 4 post-infection (**C**) and in PMA-differentiated THP-1 cells at days 1 and 4 post-infection confirms results from the qPCR analyses. DAPI (blue) was used to visualize host cell nuclei, anti-*Rickettsia* antibody (RcPFA) followed by Alexa Fluor 488 (green) was utilized to reveal *R. rickettsii*, and Alexa Fluor 546 Phalloidin (red) was used to indicate the host actin cytoskeleton in **C** and **D**.

**Supplemental Figure 4. TlyC and Pld protein sequence conservation in pathogenic and non-pathogenic *Rickettsia* species.** Percent identities of TlyC (**A**) and Pld (**B**) protein homologues were generated from protein sequences (RefSeq) for each indicated *Rickettsia* species when compared to *R. rickettsii* “Sheila Smith” proteins using the NCBI Blastp algorithm.

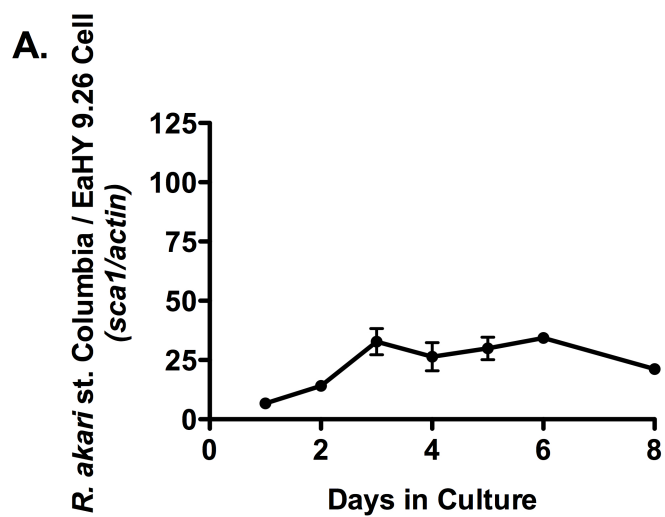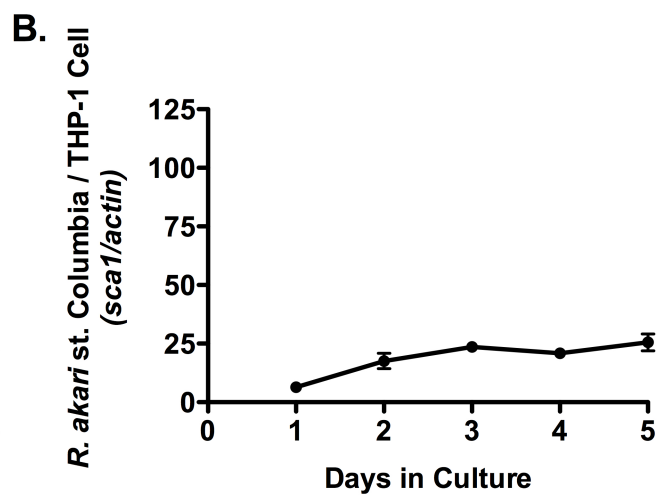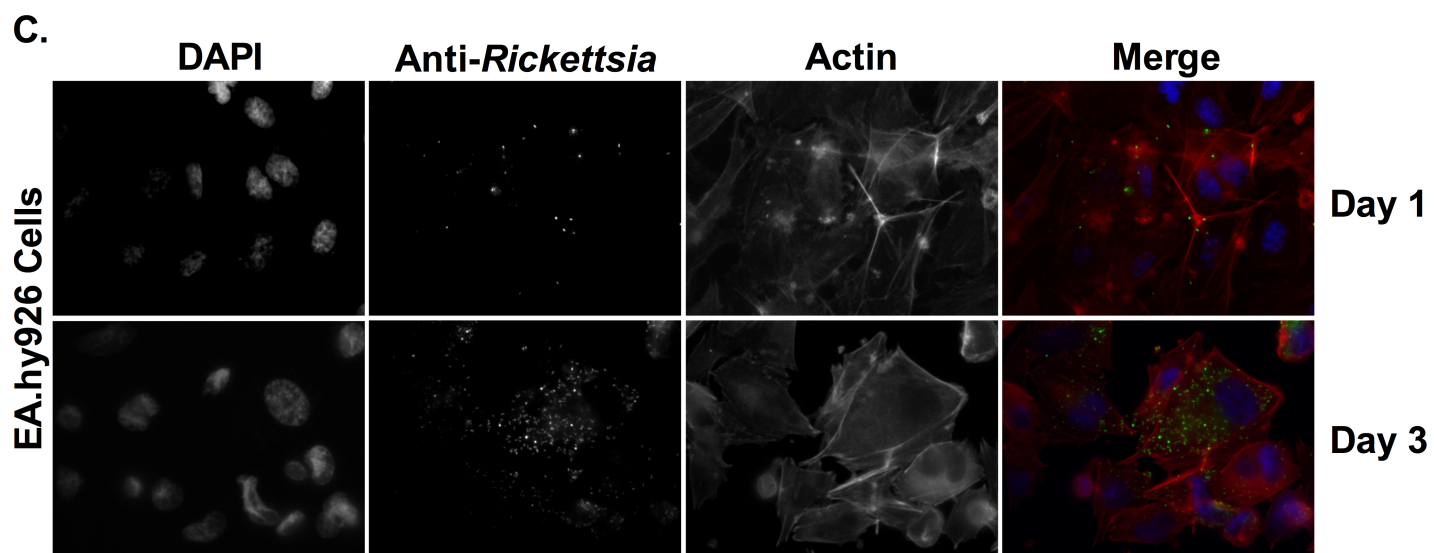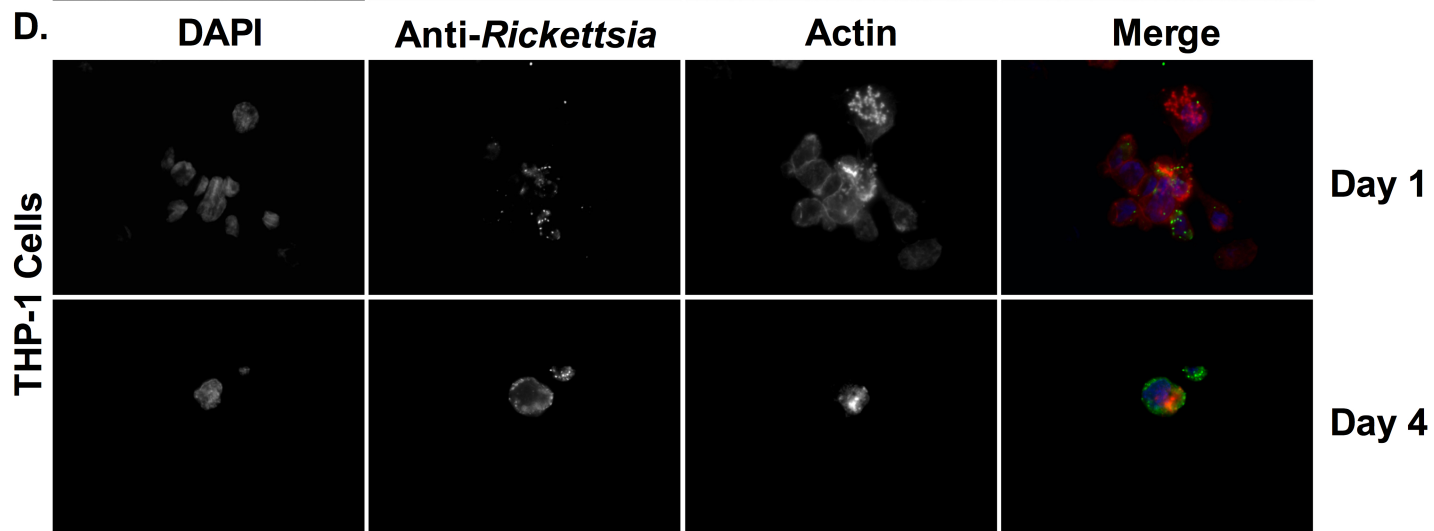

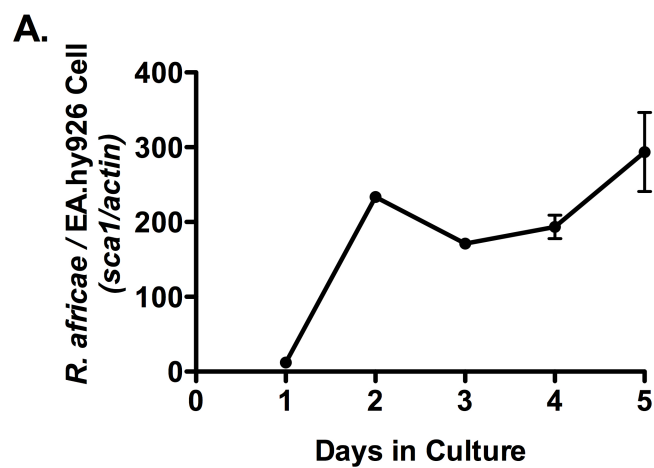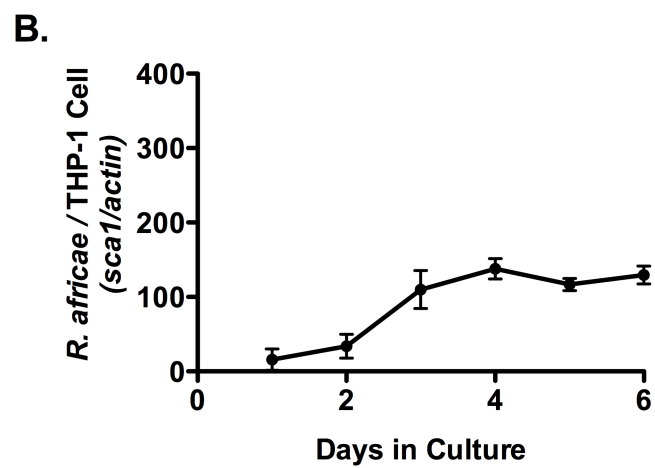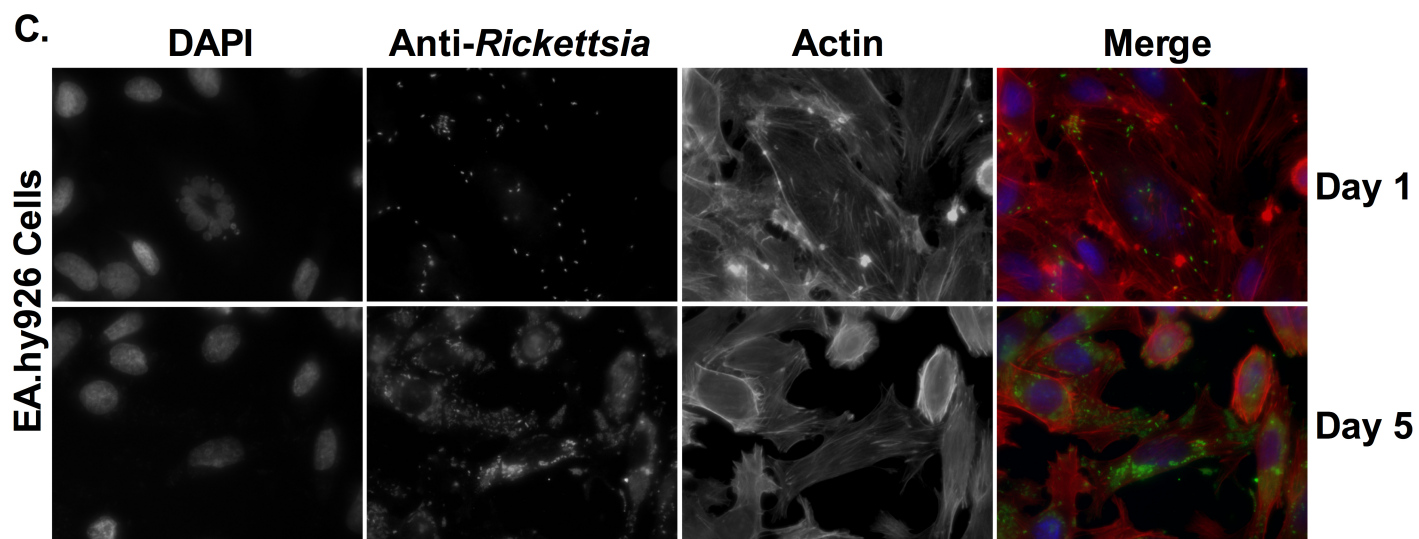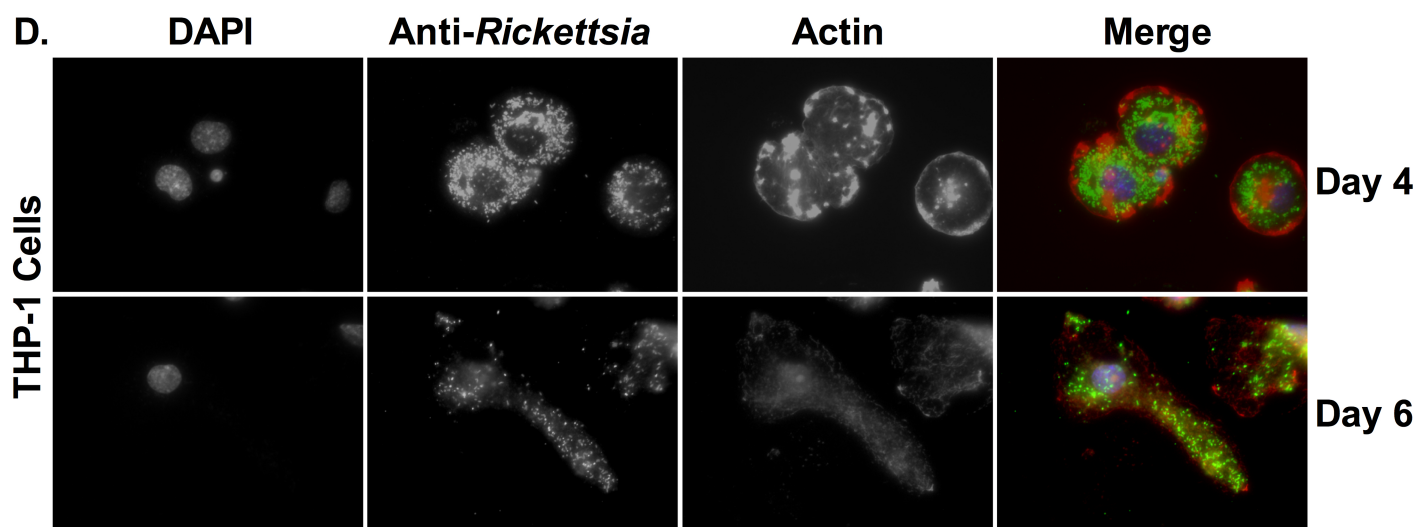

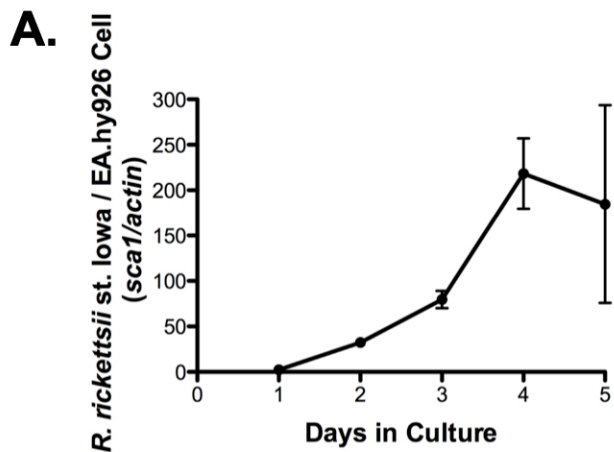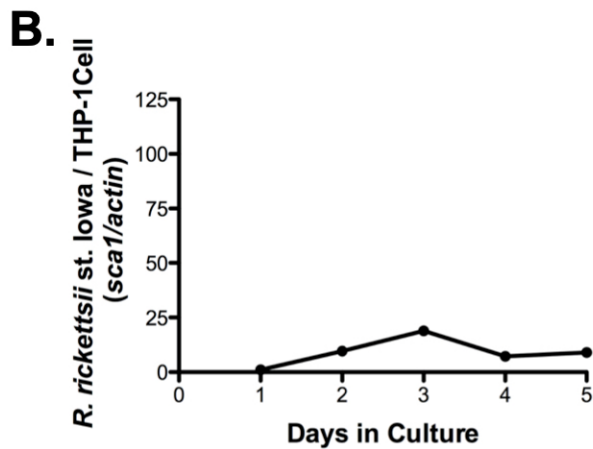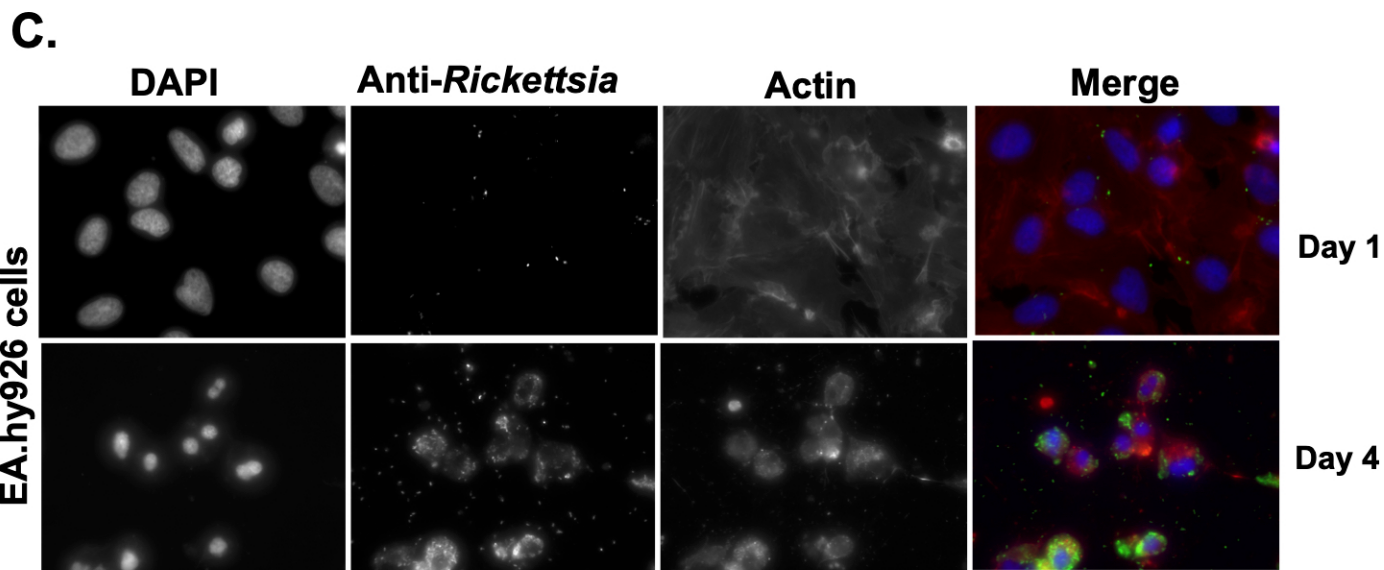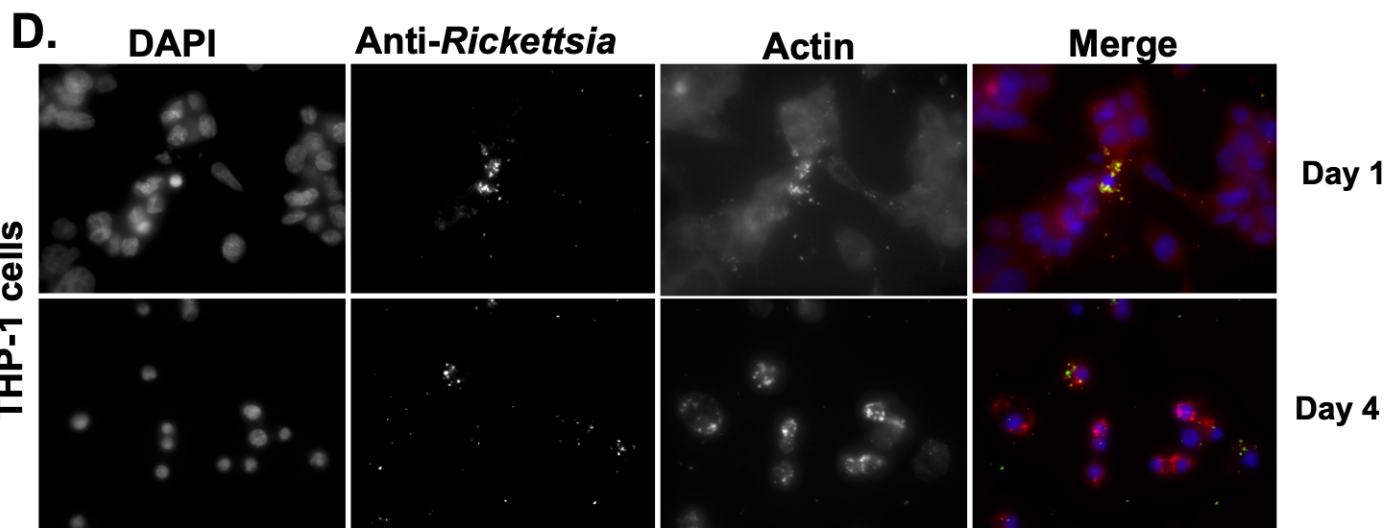

**A**

| Species                                | RefSeq number   | Amino acids | % identity |
|----------------------------------------|-----------------|-------------|------------|
| <i>R. rickettsii</i><br>"Sheila Smith" | WP_012151259.1  | 299         |            |
| <i>R. rickettsii</i><br>"Iowa"         | WP_0121511259.1 | 299         | 100        |
| <i>R. conorii</i>                      | WP_010977712.1  | 299         | 99.7       |
| <i>R. africae</i>                      | WP_012719992.1  | 299         | 99.7       |
| <i>R. parkeri</i>                      | WP_014411035.1  | 299         | 99.0       |
| <i>R. akari</i>                        | WP_012150023.1  | 301         | 96.6       |
| <i>R. bellii</i>                       | WP_011477962.1  | 301         | 82.4       |

**B**

| Species                                | RefSeq number  | Amino acids | % identity |
|----------------------------------------|----------------|-------------|------------|
| <i>R. rickettsii</i><br>"Sheila Smith" | WP_012151375.1 | 200         |            |
| <i>R. rickettsii</i><br>"Iowa"         | WP_012151375.1 | 200         | 100        |
| <i>R. conorii</i>                      | WP_010977832.1 | 200         | 98         |
| <i>R. parkeri</i>                      | WP_014411111.1 | 200         | 97.5       |
| <i>R. africae</i>                      | WP_012720066.1 | 200         | 96.5       |
| <i>R. akari</i>                        | WP_012150121.1 | 200         | 92         |
| <i>R. bellii</i>                       | WP_011476870.1 | 201         | 79.1       |
